# Supplementary material for: Evaluation of cutaneous immune response in a controlled human in vivo model of mosquito bites
Source: PubMed Central journal article supplement (PMC9672097; doi:10.1038/s41467-022-34534-9), 2022-11-17
Supplement: 41467_2022_34534_MOESM1_ESM.pdf [file 41467_2022_34534_MOESM1_ESM.pdf]

## SUPPLEMENTARY INFORMATION

### Supplementary Tables

| Characteristic                           | Total            | Immunohistochemistry | RNASeq            | Flow Cytometry    |
|------------------------------------------|------------------|----------------------|-------------------|-------------------|
| n                                        | 30               | 10                   | 10                | 10                |
| Age, median years [IQR]                  | 32.5 [21.75, 37] | 33.5 [22.0, 35.0]    | 33.5 [25.5, 38.5] | 30.0 [21.0, 36.0] |
| Female                                   | 13 (43.3)        | 5 (50.0)             | 5 (50.0)          | 3 (30.0)          |
| Occupation                               |                  |                      |                   |                   |
| Businessman/seller/entrepreneur          | 3 (10.0)         | 0 (0.0)              | 0 (0.0)           | 3 (30.0)          |
| Government Employee                      | 1 (3.3)          | 0 (0.0)              | 0 (0.0)           | 1 (10.0)          |
| Factory Worker                           | 1 (3.3)          | 0 (0.0)              | 1 (10.0)          | 0 (0.0)           |
| Farmer/Agriculture                       | 1 (3.3)          | 0 (0.0)              | 1 (10.0)          | 0 (0.0)           |
| Freelancer                               | 3 (10.0)         | 0 (0.0)              | 0 (0.0)           | 3 (30.0)          |
| Public Company Employee/State Enterprise | 4 (13.3)         | 0 (0.0)              | 2 (20.0)          | 2 (20.0)          |
| Soldier                                  | 1 (3.3)          | 1 (10.0)             | 0 (0.0)           | 0 (0.0)           |
| Student                                  | 2 (6.7)          | 0 (0.0)              | 2 (20.0)          | 0 (0.0)           |
| Unemployed                               | 14 (46.7)        | 9 (90.0)             | 4 (40.0)          | 1 (10.0)          |
| Housing                                  |                  |                      |                   |                   |
| House                                    | 20 (66.7)        | 10 (100.0)           | 10 (100.0)        | 0 (0.0)           |
| Apartment                                | 10 (33.3)        | 0 (0.0)              | 0 (0.0)           | 10 (100.0)        |
| Socioeconomic Class                      |                  |                      |                   |                   |
| Lower                                    | 5 (16.7)         | 3 (30.0)             | 0 (0.0)           | 2 (20.0)          |
| Middle                                   | 25 (83.3)        | 7 (70.0)             | 10 (100.0)        | 8 (80.0)          |
| Num. Children in Household               |                  |                      |                   |                   |
| 1-2                                      | 13 (43.3)        | 6 (60.0)             | 4 (40.0)          | 3 (30.0)          |
| 3-4                                      | 13 (43.3)        | 3 (30.0)             | 5 (50.0)          | 5 (50.0)          |
| 5+                                       | 4 (13.3)         | 1 (10.0)             | 1 (10.0)          | 2 (20.0)          |

|                                        |             |            |             |            |
|----------------------------------------|-------------|------------|-------------|------------|
| Num. Domestic Water Containers in Home |             |            |             |            |
| 1-2                                    | 22 (73.3)   | 7 (70.0)   | 8 (80.0)    | 7 (70.0)   |
| 3-4                                    | 7 (23.3)    | 3 (30.0)   | 2 (20.0)    | 2 (20.0)   |
| 5+                                     | 1 (3.3)     | 0 (0.0)    | 0 (0.0)     | 1 (10.0)   |
|                                        |             |            |             |            |
| Frequency of Bednet Use                |             |            |             |            |
| Never                                  | 9 (30.0)    | 3 (30.0)   | 2 (20.0)    | 4 (40.0)   |
| Rarely                                 | 0 (0.0)     | 0 (0.0)    | 0 (0.0)     | 0 (0.0)    |
| Regularly/Most of the Time             | 4 (13.3)    | 0 (0.0)    | 0 (0.0)     | 4 (40.0)   |
| All of the time                        | 17 (56.7)   | 7 (70.0)   | 8 (80.0)    | 2 (20.0)   |
|                                        |             |            |             |            |
| Larvicide Use in Home                  |             |            |             |            |
| No                                     | 28 (93.3)   | 10 (100.0) | 10 (100.0)  | 8 (80.0)   |
| Yes                                    | 2 (6.6)     | 0 (0.0)    | 0 (0.0)     | 2 (20.0)   |
|                                        |             |            |             |            |
| Insecticide Use in Home                |             |            |             |            |
| No                                     | 19 (63.3)   | 6 (60.0)   | 5 (50.0)    | 8 (80.0)   |
| Yes                                    | 11 (36.7)   | 4 (40.0)   | 5 (50.0)    | 2 (20.0)   |
|                                        |             |            |             |            |
| Mosquito Coil Use in Home              |             |            |             |            |
| No                                     | 10 (33.3)   | 7 (70.0)   | 2 (20.0)    | 1 (10.0)   |
| Yes                                    | 20 (66.7)   | 3 (30.0)   | 8 (80.0)    | 9 (90.0)   |
|                                        |             |            |             |            |
| Ever Had Dengue Infection              |             |            |             |            |
| No                                     | 27 (90.0)   | 9 (90.0)   | 10 (100.0)  | 8 (80.0)   |
| Yes                                    | 3 (10.0)    | 1 (10.0)   | 0 (0.0)     | 2 (20.0)   |
|                                        |             |            |             |            |
| Insect Bites in Last 30 Days           |             |            |             |            |
| No                                     | 2 (6.7)     | 0 (0.0)    | 1 (10.0)    | 1 (10.0)   |
| Yes                                    | 28 (93.3)   | 10 (100.0) | 9 (90.0)    | 9 (90.0)   |
|                                        |             |            |             |            |
| Mean Num. Bites (Min, Max)             | 5.9 (3, 10) | 4.9 (3, 7) | 7.1 (5, 10) | 5.6 (3, 8) |
|                                        |             |            |             |            |
| Redness                                |             |            |             |            |

|                                               |             |             |             |             |
|-----------------------------------------------|-------------|-------------|-------------|-------------|
| No                                            | 7 (23.3)    | 0 (0.0)     | 6 (60.0)    | 1 (10.0)    |
| Yes                                           | 23 (76.7)   | 10 (100.0)  | 4 (40.0)    | 9 (90.0)    |
|                                               |             |             |             |             |
| Swelling                                      |             |             |             |             |
| No                                            | 1 (3.3)     | 0 (0.0)     | 1 (10.0)    | 0 (0.0)     |
| Yes                                           | 29 (96.7)   | 10 (100.0)  | 9 (90.0)    | 10 (100.0)  |
|                                               |             |             |             |             |
| Mean Bite Size,<br>mm (S.D.)                  |             |             |             |             |
| 15 min                                        | 5.0 (2.8)   | 4.4 (1.2)   | 6.2 (4.1)   | 4.4 (2.3)   |
| 30 min                                        | 4.8 (3.3)   | 4.1 (1.3)   | 6.0 (4.8)   | 4.3 (2.7)   |
| 4 hours                                       | 2.2 (1.2)   | 1.9 (1.1)   | 2.6 (0.9)   | 2.0 (1.5)   |
| 48 hours                                      | 1.1 (1.2)   | 1.6 (1.4)   | 1.3 (1.1)   | 0.5 (0.7)   |
|                                               |             |             |             |             |
| Mean OD (S.D.) to<br><i>Aedes aegypti</i> SGE |             |             |             |             |
| Day 0                                         | 0.16 (0.08) | 0.15 (0.06) | 0.17 (0.10) | 0.16 (0.07) |
| Day 14                                        | 0.17 (0.07) | 0.15 (0.06) | 0.17 (0.10) | 0.17 (0.06) |
|                                               |             |             |             |             |
| Positive on<br>PanBio® Dengue<br>Indirect IgG | 30 (100)    | 10 (100)    | 10 (100)    | 10 (100)    |
|                                               |             |             |             |             |

Supplementary Table 1. **Cohort Demographics by Sample Evaluation Modality.** All data presented as n (%) unless otherwise stated. OD = optical density SGE = salivary gland extract.

| <b>Fluorochrome</b> | <b>Innate 1</b>                                                    | <b>Innate 2</b>                                                 | <b>Adaptive</b>                                                       |
|---------------------|--------------------------------------------------------------------|-----------------------------------------------------------------|-----------------------------------------------------------------------|
| <b>BUV395</b>       | CD3 (BD biosciences, cat# 564001, Clone SK7, Lot#0030938)          |                                                                 | CD3 (BD biosciences, cat# 564001, Clone SK7, Lot#0030938)             |
| <b>BUV496</b>       | CD4 (BD biosciences, cat# 612936, Clone SK3, Lot#0346317)          |                                                                 | CD4 (BD biosciences, cat# 612936, Clone SK3, Lot#0346317)             |
| <b>BUV737</b>       |                                                                    | CD16 (BD biosciences, cat# 612787, Clone 3G8, Lot#1198885)      | CCR7 (CD197) (BD biosciences, cat# 749676, Clone 2-L1-A, Lot#1025804) |
| <b>BV421</b>        |                                                                    | CD163 (BioLegend, cat# 333611, Clone GHI/61, Lot#B315613)       | CD45RA (BioLegend, cat# 304130, Clone HI100, Lot#B333212)             |
| <b>BV605</b>        |                                                                    | CD14 (BioLegend, cat# 367125, Clone 63D3, Lot#B307957)          | CLA (BD biosciences, cat# 563960, Clone HECA-452, Lot#0177315)        |
| <b>BV650</b>        | CD1c (BioLegend, cat# 331541, Clone L161, Lot#B297623)             |                                                                 | CD194 (BD biosciences, cat# 744140, Clone 1G1, Lot#0239874)           |
| <b>BV711</b>        |                                                                    | CD56 (NCAM) (BioLegend, cat# 331541, Clone 5.1H11, Lot#B318236) | CD183 (CXCR3) (BioLegend, cat# 353732, Clone G025H7, Lot#B264427)     |
| <b>BV785</b>        | CD69 (BioLegend, cat# 310932, Clone FN50, Lot#B326498)             | CD69 (BioLegend, cat# 310932, Clone FN50, Lot#B326498)          | CD69 (BioLegend, cat# 310932, Clone FN50, Lot#B326498)                |
| <b>BB515</b>        |                                                                    | CD117 (BD biosciences, cat# 565172, Clone 104D2, Lot#0119993)   |                                                                       |
| <b>PE-Texas Red</b> | CD45 (BioLegend, cat# 982308, Clone HI30, Lot#B350011)             | CD45 (BioLegend, cat# 982308, Clone HI30, Lot#B350011)          | CD45 (BioLegend, cat# 982308, Clone HI30, Lot#B350011)                |
| <b>PE</b>           | CD207 (Langerin) (BioLegend, cat# 352203, Clone 10E2, Lot#B253018) |                                                                 |                                                                       |
| <b>BB700</b>        |                                                                    | CD11b (BD biosciences, cat#                                     |                                                                       |

|                 |                                                            |                                                            |                                                                       |
|-----------------|------------------------------------------------------------|------------------------------------------------------------|-----------------------------------------------------------------------|
|                 |                                                            | 746004, Clone D12,<br>Lot#0239883)                         |                                                                       |
| <b>PE-Cy7</b>   |                                                            |                                                            | CD279 (PD-1) (BD biosciences, cat# 561272, Clone EH12.1, Lot#0022949) |
| <b>APC</b>      |                                                            |                                                            |                                                                       |
| <b>APC-R700</b> | CD25 (BD biosciences, cat# 565106, Clone 2A3, Lot#0238004) | CD25 (BD biosciences, cat# 565106, Clone 2A3, Lot#0238004) | CD25 (BD biosciences, cat# 565106, Clone 2A3, Lot#0238004)            |
| <b>APC-H7</b>   | CD8 (BD biosciences, cat# 560179, Clone SK1, Lot#1039448)  |                                                            | CD8 (BD biosciences, cat# 560179, Clone SK1, Lot#1039448)             |
| <b>Amcyan</b>   | <b>Viability</b>                                           | <b>Viability</b>                                           | <b>Viability</b>                                                      |

Supplementary Table 2. **List of antibodies used for flow cytometry analysis, clones, catalog numbers, lot numbers and fluorochromes.**

## Supplementary Figures

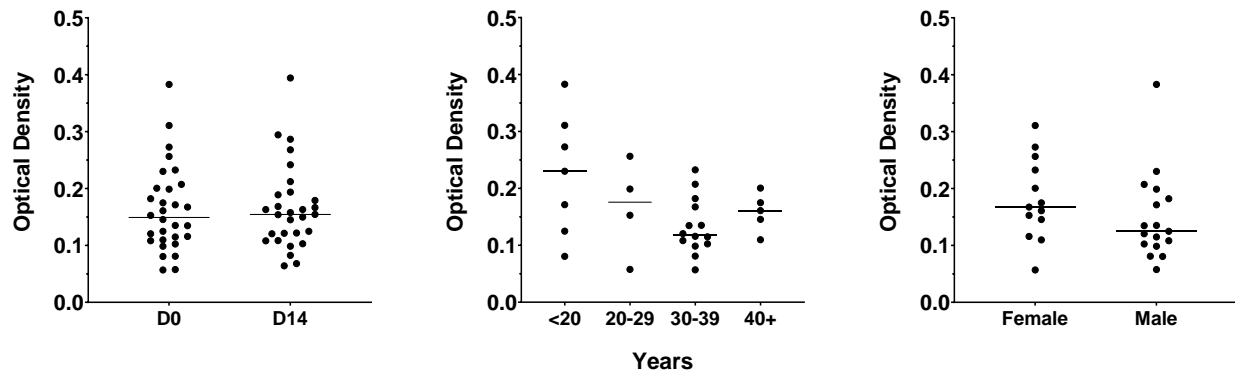

Supplementary Figure 1. **Change in optical density of anti-SGE IgG by time, age, and gender as measured by *Aedes aegypti* salivary IgG ELISA.** No significant differences were noted in the groups. Line represents median. N=30 individuals. Source data are provided as a Source Data file.

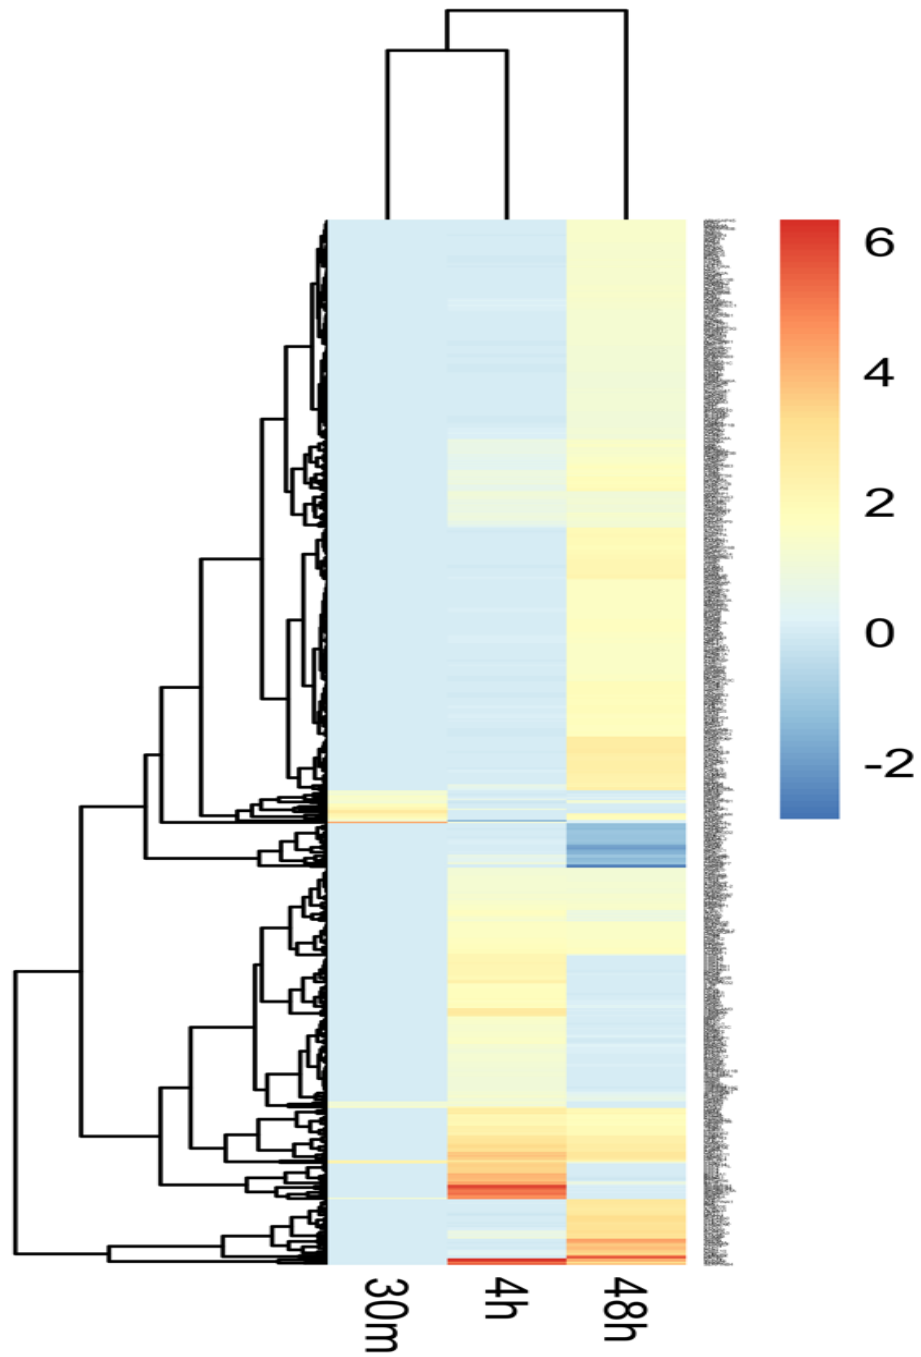

Supplementary Figure 2. **Comprehensive heat map of all differentially expressed genes at all time points.** Gene expression in dissociated skin at 30 minutes, 4 hours and 48 hours after mosquito bite are either significantly upregulated (red) or downregulated (blue).

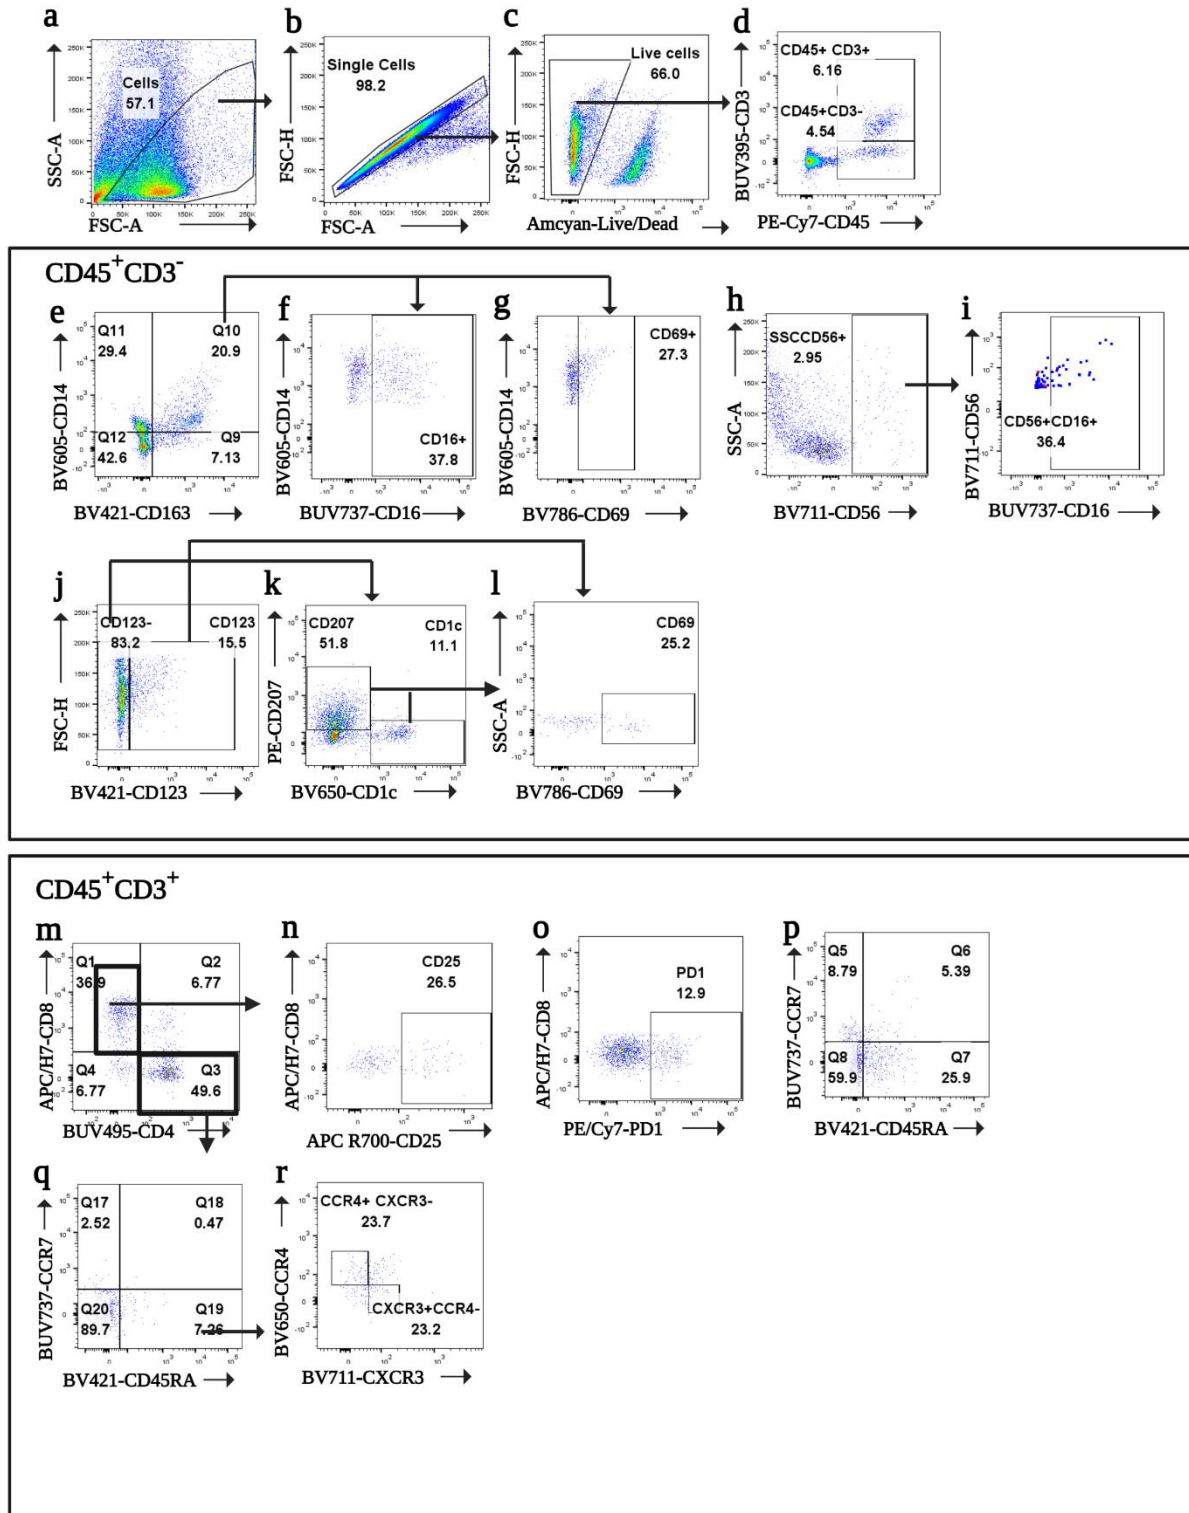

Supplementary Figure 3. **Flow cytometry gating strategy.** (a) All cells. (b) Singlets. (c) Live cells. (d) CD3<sup>+</sup> and CD45<sup>+</sup> gates. (e) M2MØ gate (CD14<sup>+</sup>CD163<sup>+</sup>). (f) M2MØ CD16<sup>+</sup>. (g) Activated M2MØ. (h) NK cells. (i) NK cells CD16<sup>+</sup>. (j) Plasmacytoid DCs. (k) Langerhans cells (CD207<sup>+</sup>) dermal DCs (CD1c<sup>+</sup>). (l) Activated Langerhans cells/dermal DCs. (m) CD8<sup>+</sup> and CD4<sup>+</sup> T cells



gates. **(n)** Activated CD8<sup>+</sup> T cells. **(o)** PD1<sup>+</sup> CD8<sup>+</sup> T cells. **(p-q)** Central memory (CCR7<sup>+</sup>CD45RA<sup>-</sup>), Naïve (CCR7<sup>+</sup>CD45RA<sup>+</sup>), Effector memory (CCR7<sup>-</sup>CD45RA<sup>-</sup>) and Terminal differentiated effector memory (CCR7<sup>-</sup>CD45RA<sup>+</sup>). **(r)** Th17/Th2 (CCR4<sup>+</sup>CXCR3<sup>-</sup>) and Th17/Th1 (CCR4<sup>-</sup>CXCR3<sup>+</sup>) compartments.

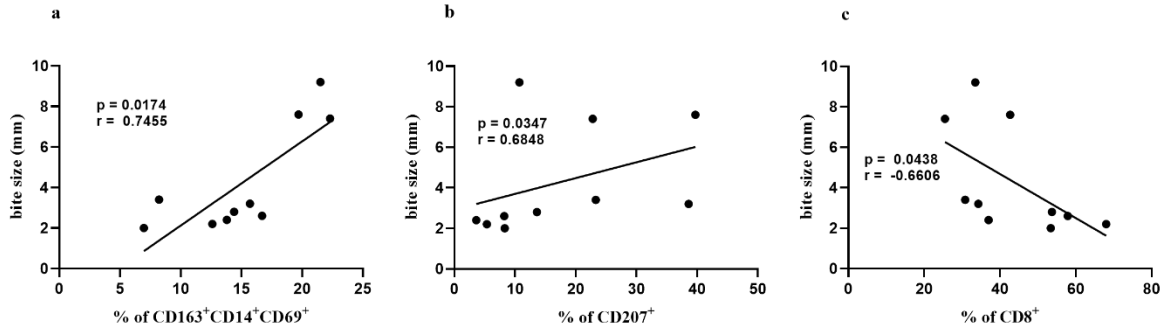

Supplementary Figure 4. **Clinically observed changes in ‘bite size’ correlate to various immunological changes.** **(a)** Positive correlation between bite size at 30 minutes and frequency of activated M2 macrophages (CD163<sup>+</sup>CD14<sup>+</sup>CD69<sup>+</sup>) and Langerhans cells **(b)**. **(c)** Negative correlation between bite size at 30 minutes and frequency of CD8<sup>+</sup> T cells at 48 hours. Statistical analysis was performed with Pearson correlation coefficient, two tailed. N=10 individuals. Source data are provided as a Source Data file.

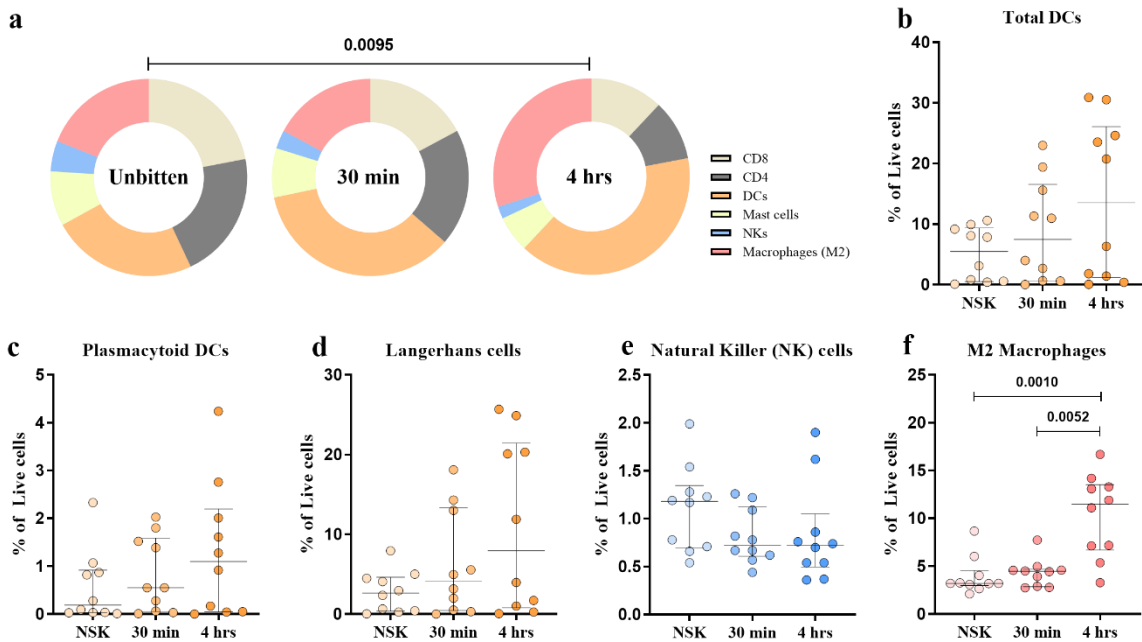

Supplementary Figure 5. **Innate immune response to mosquito bites via flow cytometric analyses.** **(a)** Pie charts showing changes in the frequencies of skin immune cells during early innate immune response to mosquito bite at 30 minutes and 4 hours after exposure. **(b-f)** Frequencies are reported as percentages of total live cells. Statistical analysis was performed

with Chi-square test, two tailed (a) and Friedman + Dunn's multiple comparisons test, two tailed with adjusted p values reported (b-f). Bars indicate median and interquartile range. N=10 individuals. Only p values <0.05 are reported. Source data are provided as a Source Data file.

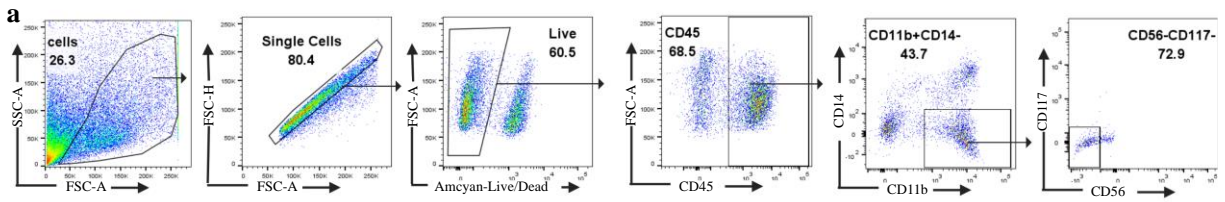

**b**

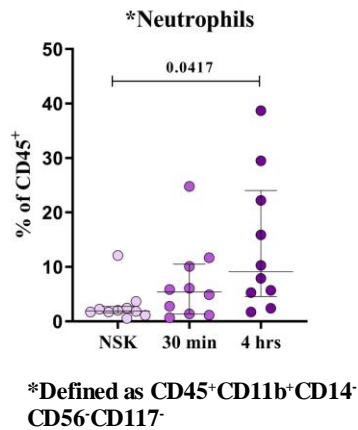

Supplementary Figure 6. **Changes in myeloid cells CD45<sup>+</sup>CD11b<sup>+</sup>CD14<sup>-</sup>CD56<sup>-</sup>CD117<sup>-</sup> frequencies.** (a) Gating strategy defining the population of myeloid cells excluding lymphocytes, monocytes/macrophages, NK cells and mast cells. (b) Change in the frequency of neutrophils – defined as CD45<sup>+</sup>CD11b<sup>+</sup>CD14<sup>-</sup>CD56<sup>-</sup>CD117<sup>-</sup>. Statistical analyses were performed with Friedman + Dunn's multiple comparisons test, two tailed with adjusted p-values reported. Bars indicate median and interquartile range. N=10 individuals. Only p values <0.05 are reported. Source data are provided as a Source Data file.

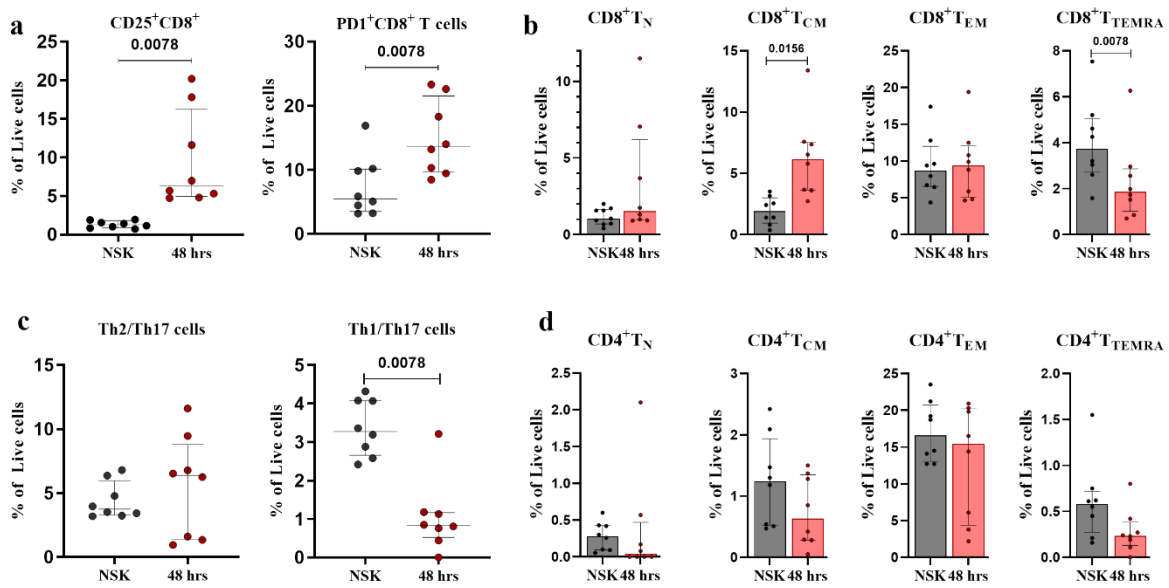

Supplementary Figure 7. **Changes in frequencies of CD4<sup>+</sup> and CD8<sup>+</sup> T cell populations as percentages of total live cells.** Statistical analysis was performed with Wilcoxon signed-rank test, two tailed (a-d). Bars indicate median and interquartile range. N=8 individuals. Only p values <0.05 are reported. Source data are provided as a Source Data file.

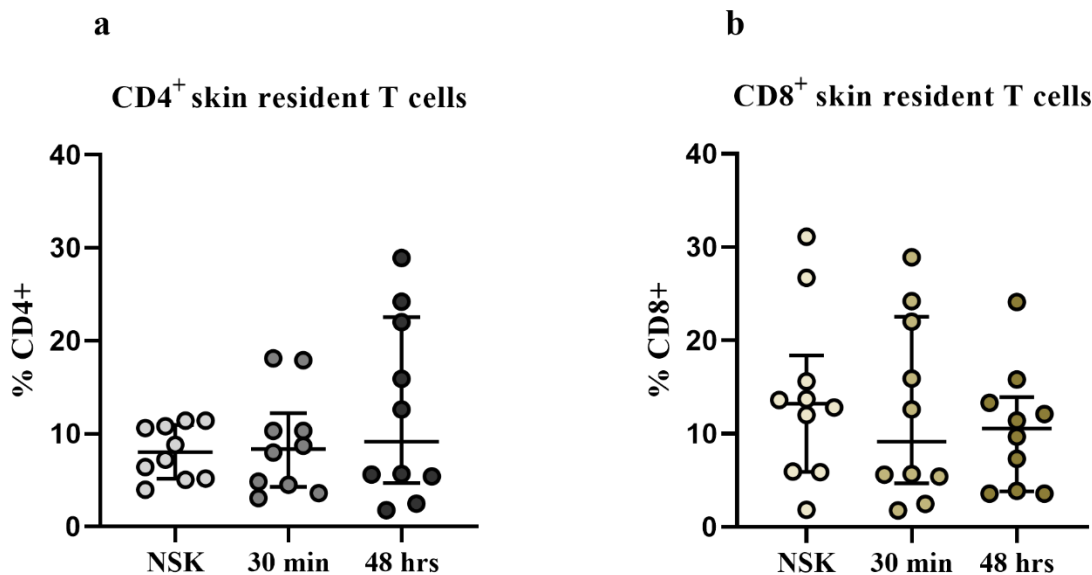

Supplementary Figure 8. **No changes are observed in the frequencies of resident T cells at any time point post mosquito bite.** (a) Frequencies of CD4<sup>+</sup>CD103<sup>+</sup>CLA<sup>+</sup> and (b) CD8<sup>+</sup>CD103<sup>+</sup>CLA<sup>+</sup> T cells in normal skin and from biopsies at 30 minutes and 4 hours post-bite. Statistical analyses were performed with Friedman + Dunn's multiple comparisons test, two tailed.

Bars indicate median and interquartile range. Only p values <0.05 are reported N=10 individuals. Source data are provided as a Source Data file.

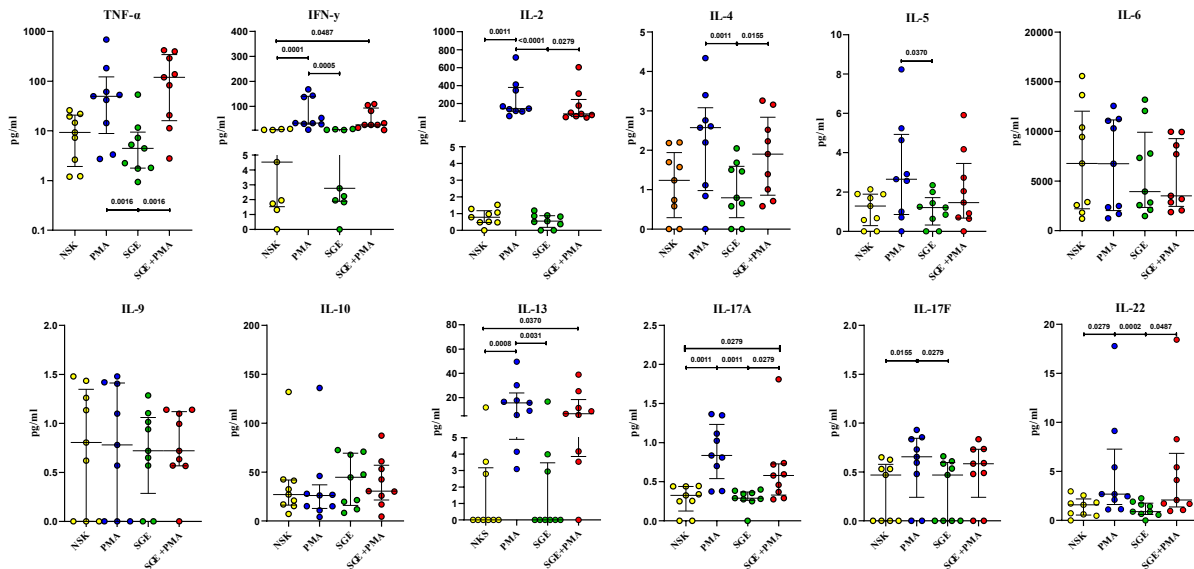

Supplementary Figure 9. **Cytokine production after stimulation with PMA/Ionomycin preparation.** Cytokine production measured in skin cell culture supernatant after treatment with PMA/Ionomycin in the presence or absence of SGE. Skin dissociated cells were seeded on round bottom 96-well plates (50,000 cells/well) and treated with SGE (10  $\mu\text{g}/\text{mL}$ ) or PBS for 24 hours. Cells were stimulated with PMA (0.1  $\mu\text{g}/\text{mL}$ ) and Ionomycin (1  $\mu\text{g}/\text{mL}$ ) or left unstimulated for the last 6 hours of the culture. Statistical analysis was performed with Friedman + Dunn's multiple comparisons test, two tailed with adjusted p-values reported. Bars indicate median and interquartile range. N=9 individuals. Only p values <0.05 are reported. Source data are provided as a Source Data file.
