# Supplementary material for: Evaluation of cutaneous immune response in a controlled human in vivo model of mosquito bites
Source: PubMed Central journal article supplement (PMC9672097; doi:10.1038/s41467-022-34534-9), 2022-11-17
Supplement: 41467_2022_34534_MOESM3_ESM.pdf [file 41467_2022_34534_MOESM3_ESM.pdf]

## **Description of Additional Supplementary Files**

**Supplementary Data 1.** List of differentially expressed genes in excel format.

**Supplementary Data 2.** List of over represented pathways at the Reactome database in excel format.

**Supplementary Data 3.** DEG under an FDR cutoff  $<0.05$  and  $\log_2FC >1$  in at least one timepoint in excel format
